# Supplementary material for: Sleep Traits, Night Shift Work and Lung Cancer Risk among Women: Results from a Population-Based Case-Control Study in France (The WELCA Study)
Source: MDPI journal article supplement (doi:10.3390/ijerph192316246), 2022-12-04
Supplement: s1 [file s1]

**Table S1.** Association between sleep traits, chronotype and lung cancer according to night work duration (never, <10 years, ≥10 years).

|                        | No night work |    |          |    |              |             | Ever night work <10 years |    |          |    |              |             | Ever night work ≥10 years |    |          |    |              |             |
|------------------------|---------------|----|----------|----|--------------|-------------|---------------------------|----|----------|----|--------------|-------------|---------------------------|----|----------|----|--------------|-------------|
|                        | Cases         |    | Controls |    | OR* (95% CI) |             | Cases                     |    | Controls |    | OR* (95% CI) |             | Cases                     |    | Controls |    | OR* (95% CI) |             |
|                        | (n=630)       |    | (n=670)  |    |              |             | (n=59)                    |    | (n=55)   |    |              |             | (n=26)                    |    | (n=33)   |    |              |             |
|                        | n             | %  | n        | %  |              |             | n                         | %  | n        | %  |              |             | n                         | %  | n        | %  |              |             |
| Sleep duration (hours) |               |    |          |    |              |             |                           |    |          |    |              |             |                           |    |          |    |              |             |
| <7                     | 202           | 32 | 225      | 34 | 1.08         | [0.78-1.48] | 26                        | 44 | 19       | 35 | 1.02         | [0.33-3.19] | 13                        | 50 | 10       | 30 | 3.62         | [0.69-18.9] |
| 7-7.9                  | 190           | 30 | 229      | 34 | 1            | ref         | 16                        | 27 | 18       | 33 | 1            | ref         | 6                         | 23 | 13       | 39 | 1            | ref         |
| ≥8                     | 236           | 38 | 213      | 32 | 1.39         | [1.02-1.89] | 17                        | 29 | 18       | 33 | 1.08         | [0.32-3.63] | 7                         | 27 | 10       | 30 | 1.28         | [0.21-7.81] |
| Sleep Disorder Index   |               |    |          |    |              |             |                           |    |          |    |              |             |                           |    |          |    |              |             |
| 0-1 (low)              | 272           | 43 | 289      | 43 | 1            | ref         | 23                        | 39 | 23       | 42 | 1            | ref         | 8                         | 31 | 16       | 49 | 1            | ref         |
| 2-3 (medium)           | 218           | 35 | 226      | 34 | 0.95         | [0.71-1.27] | 17                        | 29 | 15       | 27 | 0.60         | [0.18-2.01] | 7                         | 27 | 10       | 30 | 0.86         | [0.15-4.88] |
| 4-5 (high)             | 140           | 22 | 155      | 23 | 0.90         | [0.65-1.25] | 19                        | 32 | 17       | 31 | 0.77         | [0.24-2.50] | 11                        | 42 | 7        | 21 | 5.88         | [1.15-30.1] |
| Chronotype             |               |    |          |    |              |             |                           |    |          |    |              |             |                           |    |          |    |              |             |
| Morning type           | 284           | 45 | 316      | 47 | 1.37         | [0.94-2.02] | 20                        | 34 | 16       | 29 | 1.87         | [0.41-8.56] | 13                        | 50 | 12       | 36 | 0.50         | [0.06-4.52] |
| Neutral type           | 77            | 12 | 101      | 15 | 1            | ref         | 5                         | 9  | 9        | 16 | 1            | ref         | 3                         | 12 | 3        | 9  | 1            | ref         |
| Evening type           | 269           | 43 | 253      | 38 | 1.21         | [0.82-1.79] | 34                        | 58 | 30       | 55 | 1.83         | [0.42-7.99] | 10                        | 39 | 18       | 55 | 0.19         | [0.02-1.85] |

Abbreviations: CI: Confidence interval, OR: Odds ratio

\* Models adjusted for age, area of residence, marital status, socio-professional category, CSI and BMI 2 years before the interview

**Table S2.** Association between sleep traits, night work and lung cancer according to chronotype.

|                        | Morning type      |    |                      |    |                  | Neutral type      |    |                      |    |                  | Evening type      |    |                      |    |                  | p<br><br>interaction |
|------------------------|-------------------|----|----------------------|----|------------------|-------------------|----|----------------------|----|------------------|-------------------|----|----------------------|----|------------------|----------------------|
|                        | Cases<br>(n= 373) |    | Controls<br>(n= 170) |    | OR* (95% CI)     | Cases<br>(n= 201) |    | Controls<br>(n= 246) |    | OR* (95% CI)     | Cases<br>(n= 142) |    | Controls<br>(n= 341) |    | OR* (95% CI)     |                      |
|                        | n                 | %  | n                    | %  |                  | n                 | %  | n                    | %  |                  | n                 | %  | n                    | %  |                  |                      |
| Sleep duration (hours) |                   |    |                      |    |                  |                   |    |                      |    |                  |                   |    |                      |    |                  |                      |
| <7                     | 109               | 34 | 110                  | 32 | 1.29 [0.82-2.01] | 32                | 39 | 52                   | 46 | 0.75 [0.32-1.78] | 101               | 32 | 92                   | 31 | 1.23 [0.77-1.97] | 0.921                |
| 7-7.9                  | 96                | 30 | 122                  | 36 | 1 ref            | 23                | 28 | 34                   | 30 | 1 ref            | 93                | 30 | 104                  | 35 | 1 ref            |                      |
| ≥8                     | 112               | 35 | 111                  | 32 | 1.42 [0.92-2.19] | 28                | 34 | 27                   | 24 | 1.54 [0.61-3.90] | 120               | 38 | 103                  | 34 | 1.41 [0.90-2.23] |                      |
| Sleep Disorder Index   |                   |    |                      |    |                  |                   |    |                      |    |                  |                   |    |                      |    |                  |                      |
| 0-1 (low)              | 145               | 46 | 150                  | 44 | 1 ref            | 33                | 39 | 43                   | 38 | 1 ref            | 126               | 40 | 135                  | 45 | 1 ref            | 0.741                |
| 2-3 (medium)           | 103               | 33 | 121                  | 35 | 0.75 [0.50-1.12] | 34                | 40 | 39                   | 35 | 1.53 [0.67-3.49] | 105               | 33 | 91                   | 30 | 1.05 [0.68-1.64] |                      |
| 4-5 (high)             | 69                | 22 | 73                   | 21 | 0.87 [0.55-1.39] | 18                | 21 | 31                   | 27 | 0.97 [0.37-2.53] | 83                | 26 | 75                   | 25 | 1.02 [0.63-1.64] |                      |
| Night work             |                   |    |                      |    |                  |                   |    |                      |    |                  |                   |    |                      |    |                  |                      |
| Never                  | 284               | 90 | 316                  | 92 | 1 ref            | 77                | 91 | 101                  | 89 | 1 ref            | 269               | 86 | 253                  | 84 | 1 ref            | 0.883                |
| Ever                   | 33                | 10 | 28                   | 8  | 1.22 [0.67-2.25] | 8                 | 9  | 12                   | 11 | 1.31 [0.38-4.57] | 44                | 14 | 48                   | 16 | 1.04 [0.61-1.77] |                      |

Abbreviations: CI: Confidence interval, OR: Odds ratio

\* Models adjusted for age, area of residence, marital status, socio-professional category, CSI and BMI 2 years before the interview
